# Supplementary material
Source: PubMed Central journal article supplement (PMC4172387)
Supplement: Supp_Fig1.pdf [file Supp_Fig1.pdf]

## Supplementary Data

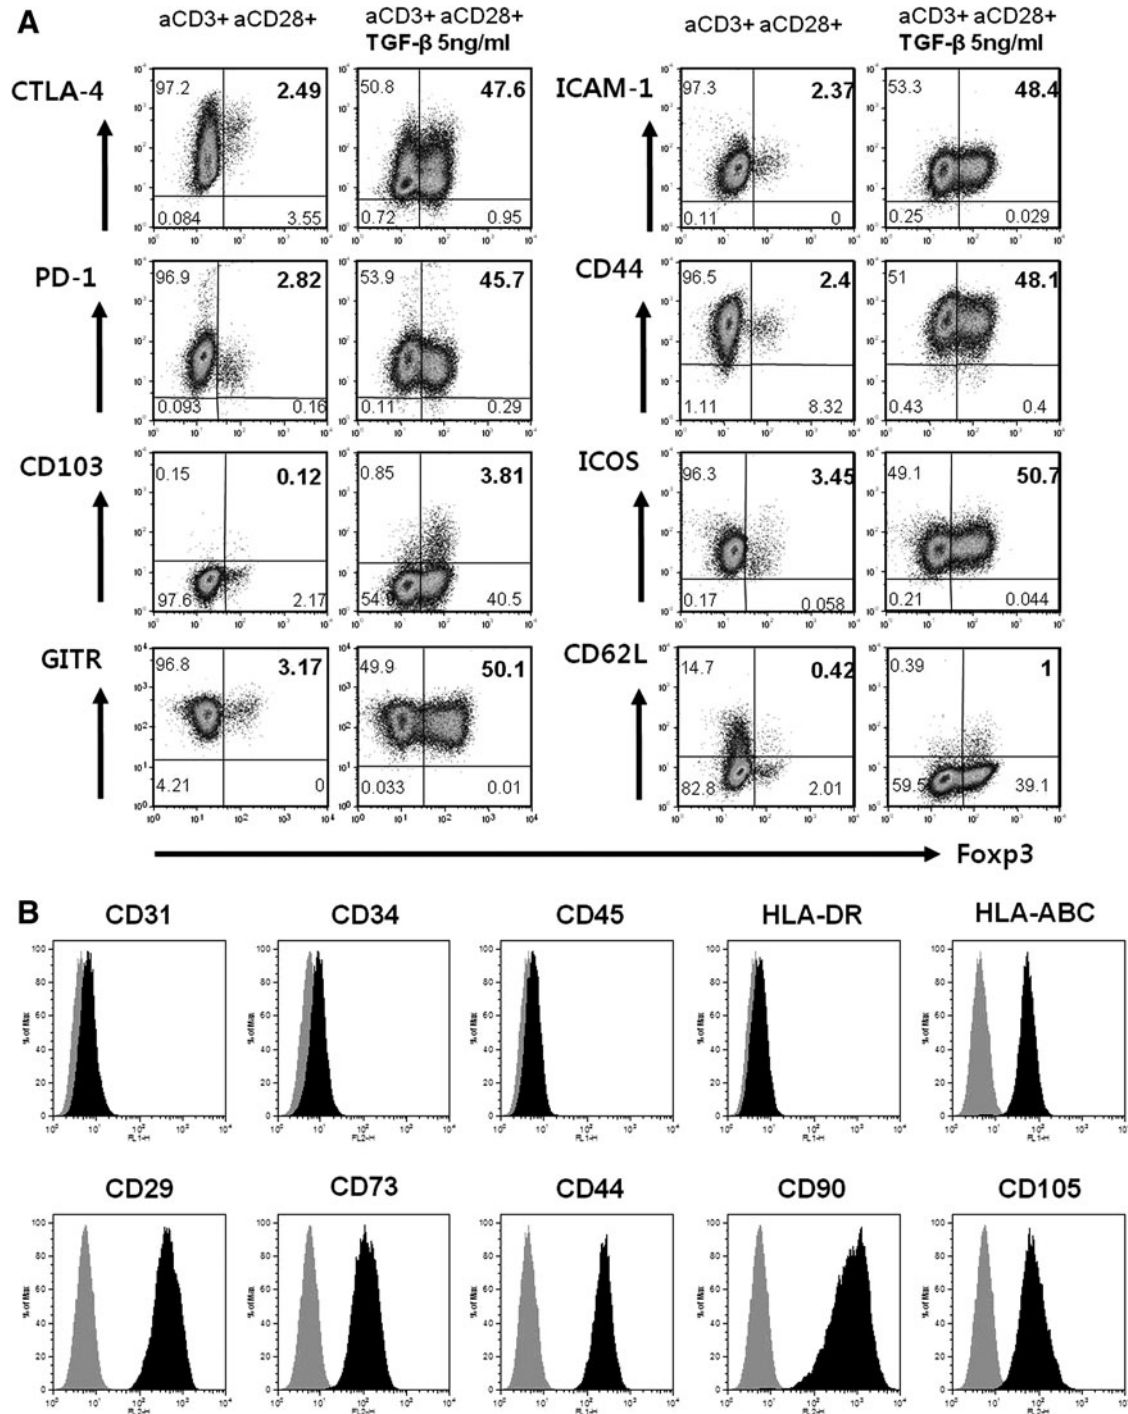

**SUPPLEMENTARY FIG. S1.** Phenotype of TGF- $\beta$ -induced regulatory T cells (Tregs) and human adipose tissue-derived mesenchymal stem cells (MSCs). **(A)** Isolated CD4<sup>+</sup> T cells from recipients (BALB/c mice) were cultured with anti-CD3 (0.5  $\mu$ g/mL), anti-CD28 (1  $\mu$ g/mL), and human recombinant TGF- $\beta$  (5 ng/mL) for 3 days. Tregs were sorted to obtain a  $\sim$ 90% pure CD4<sup>+</sup>CD25<sup>+</sup> population. Cells were analyzed by FACS for intracellular Foxp3 and surface expression of the indicated cellular markers (CTLA-4, PD-1, CD103, GITR, ICAM-1, CD44, ICOS, and CD62L) in the gated T-cell populations. The percentages are those of double-positive cells. **(B)** FACS analysis of in vitro-expanded adipose tissue-derived MSCs from humans. MSCs were distinguished from hematopoietic cells by being negative for the cell surface markers CD31, CD34, CD45, and HLA-DR, but expressing CD29, CD73, CD44, CD90, CD105, and HLA-ABC.
