# Supplementary material
Source: PubMed Central journal article supplement (PMC4172387)
Supplement: Supp_Fig2.pdf [file Supp_Fig2.pdf]

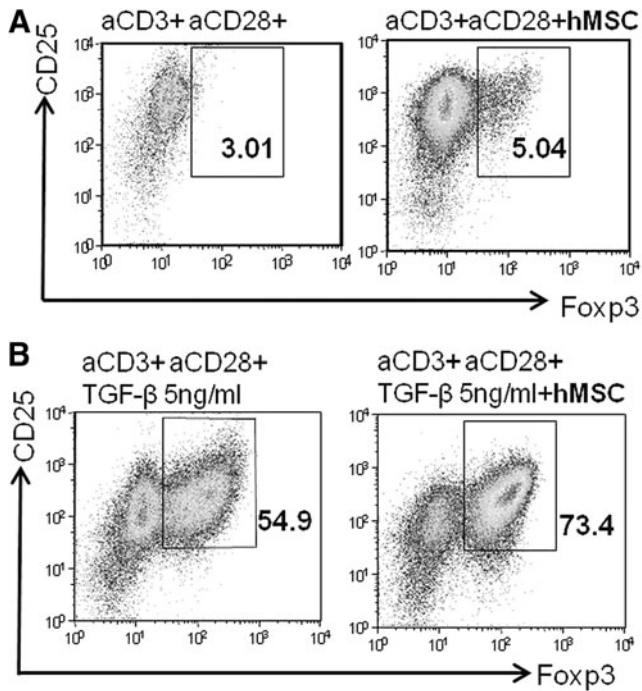

**SUPPLEMENTARY FIG. S2.** Human MSCs increase the frequency of Foxp3<sup>+</sup> Treg cells. **(A)** BALB/c CD4<sup>+</sup> T cells ( $1 \times 10^6$ ) were activated with pre-coated anti-CD3 ( $0.5 \mu\text{g/mL}$ ) and anti-CD28 ( $1 \mu\text{g/mL}$ ) with or without human MSCs ( $1 \times 10^5$ ). **(B)** BALB/c CD4<sup>+</sup> T cells ( $1 \times 10^6$ ) were activated with pre-coated anti-CD3 ( $1 \mu\text{g/mL}$ ) and soluble anti-CD28 ( $1 \mu\text{g/mL}$ ), in the presence of TGF- $\beta$  ( $5 \text{ ng/mL}$ ) or both TGF- $\beta$  and human MSCs ( $1 \times 10^5$ ). After culturing for 3 days, the cells were collected, and Foxp3 expression was analyzed by FACS. Data are representative of five independent experiments.
