# Supplementary material
Source: PubMed Central journal article supplement (PMC4172387)
Supplement: Supp_Fig3.pdf [file Supp_Fig3.pdf]

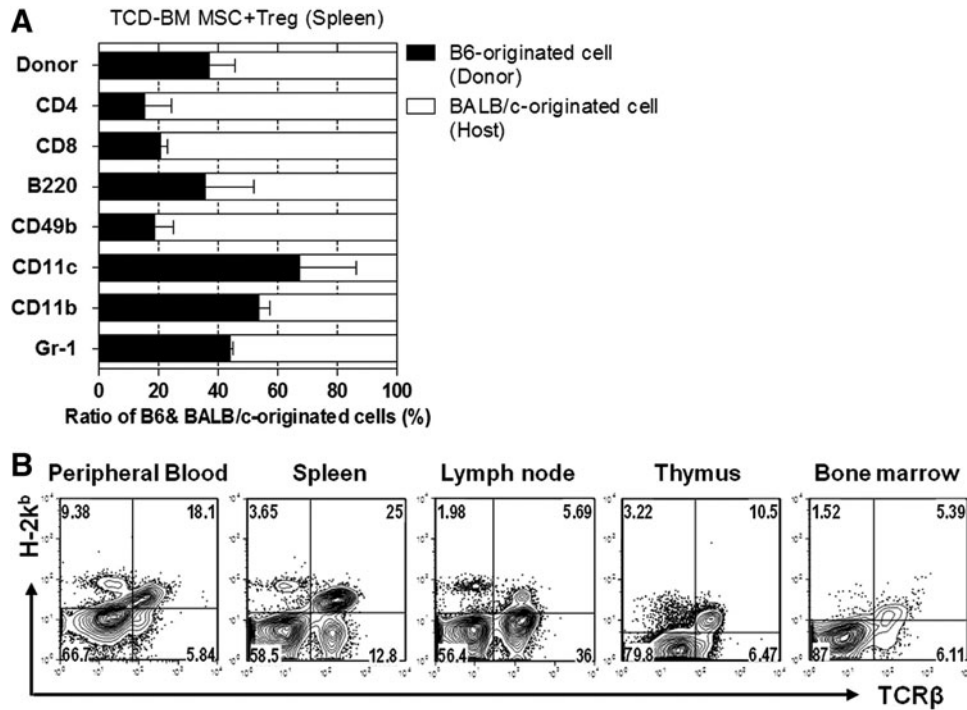

**SUPPLEMENTARY FIG. S3.** Combinatory cell-based immune modulation (CCIM) with MSCs and Tregs in the early post-transplant period induces stable hematopoietic chimerism without graft-versus-host disease in full major histocompatibility complex (MHC)-mismatched murine models. Pre-transplant conditions are described in the Materials and Methods section. On day 0, recipients received  $3 \times 10^7$  T-cell-depleted (TCD) bone marrow (BM) cells from MHC-mismatched C57BL/6 ( $H-2^b$ ) donors. On days +1 and +3 after bone marrow transplantation (BMT), recipients received  $2 \times 10^6$  MSCs,  $2 \times 10^6$  Treg cells, or  $2 \times 10^6$  MSCs plus  $2 \times 10^6$  Treg cells (one representative of four independent experiments). **(A)** One year after BMT, lineage-specific staining was performed with antibodies for combinations of T-cell markers (anti-CD4 and anti-CD8), myeloid makers (anti-CD11b, anti-CD11c, and anti-Gr-1), a B-cell marker (anti-B220), and a natural killer (NK) cell marker (anti-CD49b). **(B)** Percentages of donor-derived cells were calculated by dividing the percentage of donor cells ( $H-2^b$ ) by the total percentage of donor ( $H-2^b$ ) plus recipient ( $H-2^d$ ) cells that showed positive staining for lineage-specific markers, and are shown in the *upper right* corner of each plot. Peripheral blood, spleen, lymph node, thymus, and BM from mixed chimerism recipients were stained with anti-TCR $\beta$  and anti- $H-2^b$ .
