# Supplementary material
Source: PubMed Central journal article supplement (PMC4172387)
Supplement: Supp_Fig5.pdf [file Supp_Fig5.pdf]

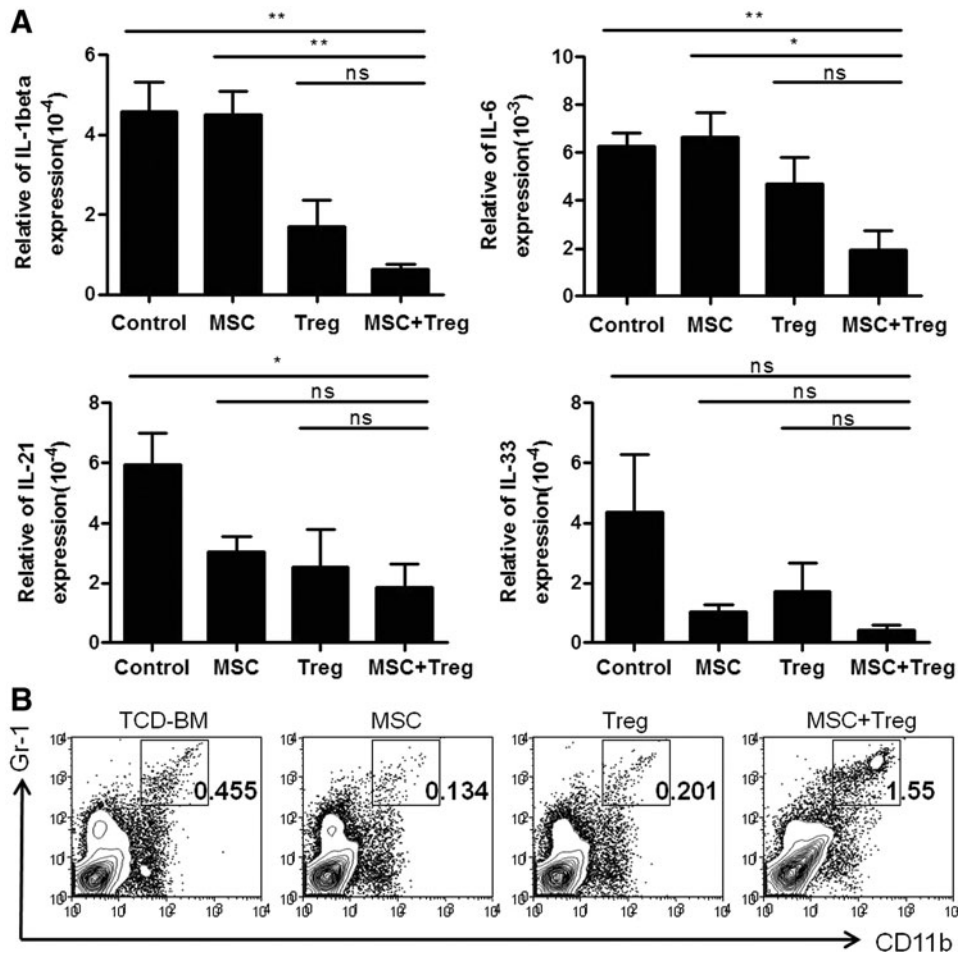

**SUPPLEMENTARY FIG. S5.** Effects of combinatory CCIM with MSCs and Tregs on proinflammatory cytokines and myeloid-derived suppressor cell (MDSC) expression. Pre-transplant conditions are described in the Materials and Methods section. On day 0, recipients received  $3 \times 10^7$  TCD BM cells from MHC-mismatched C57BL/6 ( $H-2^b$ ) donors. On days +1 and +3 after BMT, recipients received  $2 \times 10^6$  MSCs,  $2 \times 10^6$  Treg cells, or  $2 \times 10^6$  MSCs plus  $2 \times 10^6$  Treg cells (one representative of four independent experiments). The splenocytes were collected at 7 days after allogeneic transplantation. **(A)** Total mRNA was extracted from spleen cells and subjected to quantitative real-time PCR analysis of the indicated genes. Data represent the relative amount of target mRNA normalized to  $\beta$ -actin. **(B)** Splenocytes were assessed at 3 weeks after allogeneic transplantation.  $CD11b^+Gr-1^+$  myeloid cells (MDSCs) were determined by FACS as indicated. \* $P < 0.05$ ; \*\* $P < 0.01$ .
